# Supplementary material
Source: PubMed Central journal article supplement (PMC4998954)
Supplement: NIHMS69110-supplement-Online_Supplement.pdf [file NIHMS69110-supplement-Online_Supplement.pdf]

## SUPPLEMENTAL MATERIAL

**Title:** Association of major depressive episodes with stroke risk in a prospective study of 0.5 million Chinese adults

**Tables:**

**Supplementary Table I.** Hazard ratio (95% confidence intervals) of incident stroke according to baseline characteristics.

**Supplementary Table II.** Stratification analysis on association between baseline depression status and incident stroke risk.

**Supplementary Table I. Hazard ratio (95% confidence intervals) of incident stroke according to baseline characteristics**

| Characteristic                           | Total stroke <sup>*</sup> |                 | Hemorrhagic stroke |                 | Ischemic stroke |                 |
|------------------------------------------|---------------------------|-----------------|--------------------|-----------------|-----------------|-----------------|
|                                          | Model 1                   | Model 2         | Model 1            | Model 2         | Model 1         | Model 2         |
| Age at baseline (yr)                     | 1.08(1.08-1.08)           | 1.07(1.07-1.07) | 1.08(1.08-1.08)    | 1.06(1.05-1.06) | 1.08(1.08-1.09) | 1.07(1.07-1.07) |
| Sex                                      |                           |                 |                    |                 |                 |                 |
| Male                                     | 1.00                      | 1.00            | 1.00               | 1.00            | 1.00            | 1.00            |
| Female                                   | 0.76(0.74-0.77)           | 0.87(0.84-0.90) | 0.63(0.60-0.67)    | 0.68(0.64-0.73) | 0.79(0.77-0.81) | 0.93(0.90-0.97) |
| Region                                   |                           |                 |                    |                 |                 |                 |
| Rural area                               | 1.00                      | 1.00            | 1.00               | 1.00            | 1.00            | 1.00            |
| Urban area                               | 1.27(1.24-1.30)           | 1.01(0.98-1.04) | 0.40(0.38-0.43)    | 0.42(0.39-0.45) | 1.65(1.60-1.69) | 1.21(1.18-1.25) |
| Currently married                        |                           |                 |                    |                 |                 |                 |
| No                                       | 1.00                      | 1.00            | 1.00               | 1.00            | 1.00            | 1.00            |
| Yes                                      | 0.53(0.51-0.55)           | 0.99(0.96-1.03) | 0.45(0.42-0.48)    | 0.85(0.78-0.91) | 0.55(0.53-0.57) | 1.04(1.00-1.08) |
| Middle school and above                  |                           |                 |                    |                 |                 |                 |
| No                                       | 1.00                      | 1.00            | 1.00               | 1.00            | 1.00            | 1.00            |
| Yes                                      | 0.75(0.73-0.77)           | 1.31(1.28-1.35) | 0.41(0.38-0.43)    | 0.94(0.88-1.01) | 0.87(0.85-0.90) | 1.44(1.40-1.49) |
| Household income $\geq$ 20 000 Yuan/year |                           |                 |                    |                 |                 |                 |
| No                                       | 1.00                      | 1.00            | 1.00               | 1.00            | 1.00            | 1.00            |
| Yes                                      | 0.78(0.76-0.80)           | 0.85(0.82-0.87) | 0.52(0.49-0.55)    | 0.70(0.66-0.75) | 0.85(0.83-0.88) | 0.87(0.84-0.89) |
| History of diabetes                      |                           |                 |                    |                 |                 |                 |
| No                                       | 1.00                      | 1.00            | 1.00               | 1.00            | 1.00            | 1.00            |
| Yes                                      | 2.75(2.65-2.85)           | 1.62(1.56-1.68) | 1.79(1.62-1.98)    | 1.33(1.20-1.47) | 3.04(2.92-3.16) | 1.69(1.62-1.76) |
| History of hypertension                  |                           |                 |                    |                 |                 |                 |
| No                                       | 1.00                      | 1.00            | 1.00               | 1.00            | 1.00            | 1.00            |

|                                |                 |                 |                 |                 |                 |                 |
|--------------------------------|-----------------|-----------------|-----------------|-----------------|-----------------|-----------------|
| Yes                            | 3.13(3.04-3.21) | 1.93(1.88-1.99) | 4.83(4.51-5.18) | 3.25(3.02-3.50) | 2.88(2.79-2.96) | 1.74(1.68-1.80) |
| Current regular smoker         |                 |                 |                 |                 |                 |                 |
| No                             | 1.00            | 1.00            | 1.00            | 1.00            | 1.00            | 1.00            |
| Yes                            | 1.12(1.09-1.15) | 1.14(1.10-1.18) | 1.39(1.31-1.47) | 1.06(0.99-1.14) | 1.05(1.02-1.09) | 1.16(1.12-1.21) |
| Current regular drinker        |                 |                 |                 |                 |                 |                 |
| No                             | 1.00            | 1.00            | 1.00            | 1.00            | 1.00            | 1.00            |
| Yes                            | 1.02(0.98-1.05) | 0.92(0.89-0.96) | 1.07(1.00-1.16) | 0.91(0.84-0.99) | 1.00(0.97-1.04) | 0.93(0.89-0.97) |
| BMI (kg/m <sup>2</sup> )       | 1.04(1.04-1.05) | 1.03(1.02-1.03) | 0.97(0.96-0.98) | 0.98(0.97-0.99) | 1.06(1.06-1.07) | 1.04(1.03-1.04) |
| Physical activity (MET-hr/day) | 0.96(0.96-0.96) | 0.99(0.98-0.99) | 0.97(0.97-0.97) | 0.99(0.99-0.99) | 0.95(0.95-0.96) | 0.98(0.98-0.98) |

Model 1: Unadjusted.

Model 2: Adjusted for age, sex, marital status, household income, education, region, smoking status, alcohol consumption, physical activity, BMI, history of hypertension and history of diabetes except for the study variable.

\* Including hemorrhagic stroke, ischemic stroke and stroke of unknown type.

BMI, body mass index; and MET, metabolic equivalent of task.

**Supplementary Table II. Stratification analysis on association between baseline depression status and incident stroke risk**

| Subgroup                           | PYs of follow-up | Incident strokes | Incidence rate (per 1000 PYs) * | HR (95% CI) †    | P for heterogeneity |
|------------------------------------|------------------|------------------|---------------------------------|------------------|---------------------|
| Age at baseline (yr)               |                  |                  |                                 |                  | 0.003               |
| <50                                | 10 715           | 50               | 2.85/4.67                       | 1.54 (1.16-2.03) |                     |
| ≥50                                | 11 233           | 133              | 12.90/11.84                     | 0.94 (0.79-1.11) |                     |
| Sex                                |                  |                  |                                 |                  | 0.766               |
| Male                               | 5985             | 55               | 9.41/9.19                       | 1.12 (0.86-1.46) |                     |
| Female                             | 15 963           | 128              | 7.13/8.02                       | 1.18 (0.99-1.40) |                     |
| Region                             |                  |                  |                                 |                  | 0.543               |
| Rural                              | 14 650           | 115              | 7.28/7.85                       | 1.11 (0.93-1.34) |                     |
| Urban                              | 7297             | 68               | 9.11/9.32                       | 1.22 (0.96-1.55) |                     |
| Marital status                     |                  |                  |                                 |                  | 0.906               |
| Married                            | 16 594           | 123              | 7.49/7.41                       | 1.14 (0.96-1.36) |                     |
| Widowed/Separated/Divorced/Never   | 5353             | 60               | 14.00/11.21                     | 1.16 (0.90-1.50) |                     |
| Education                          |                  |                  |                                 |                  | 0.047               |
| Illiteracy or primary school       | 12 425           | 106              | 9.20/8.53                       | 1.02 (0.85-1.24) |                     |
| Middle school and above            | 9522             | 77               | 6.87/8.09                       | 1.38 (1.10-1.73) |                     |
| Household income ≥20 000 Yuan/year |                  |                  |                                 |                  | 0.490               |
| No                                 | 15 365           | 135              | 8.92/8.79                       | 1.11 (0.94-1.31) |                     |
| Yes                                | 6582             | 48               | 6.86/7.29                       | 1.25 (0.94-1.66) |                     |
| Smoking status                     |                  |                  |                                 |                  | 0.024               |
| Not current                        | 17 370           | 129              | 7.82/7.43                       | 1.05 (0.88-1.25) |                     |
| Current                            | 4577             | 54               | 8.70/11.80                      | 1.51 (1.16-1.98) |                     |
| Alcohol consumption                |                  |                  |                                 |                  | 0.081               |
| Not current                        | 19 770           | 159              | 8.03/8.04                       | 1.10 (0.94-1.29) |                     |

|                                |                    |        |     |             |                  |       |
|--------------------------------|--------------------|--------|-----|-------------|------------------|-------|
| Physical activity (MET-hr/day) | Current            | 2177   | 24  | 8.17/11.02  | 1.62 (1.08-2.41) | 0.599 |
|                                | <12.29             | 7667   | 89  | 13.94/11.61 | 1.06 (0.86-1.31) |       |
|                                | 12.29 to <25.31    | 7183   | 58  | 6.81/8.07   | 1.25 (0.97-1.62) |       |
| BMI (kg/m <sup>2</sup> )       | ≥25.31             | 7097   | 36  | 4.16/5.07   | 1.19 (0.86-1.66) | 0.552 |
|                                | <24.0              | 13 813 | 109 | 7.09/7.89   | 1.23 (1.02-1.49) |       |
|                                | 24.0 to <28.0      | 6210   | 54  | 8.82/8.70   | 1.05 (0.81-1.38) |       |
| Hypertension                   | ≥28.0              | 1924   | 20  | 10.99/10.39 | 1.02 (0.66-1.59) | 0.834 |
|                                | No                 | 12 228 | 54  | 3.98/4.42   | 1.17 (0.90-1.53) |       |
| Diabetes                       | Yes                | 9719   | 129 | 12.38/13.27 | 1.13 (0.95-1.35) | 0.207 |
|                                | No                 | 20 681 | 165 | 7.42/7.98   | 1.18 (1.02-1.38) |       |
| Stroke subtypes ‡              | Yes                | 1266   | 18  | 20.04/14.21 | 0.86 (0.54-1.38) | 0.898 |
|                                | Hemorrhagic stroke | 21 236 | 40  | 1.58/1.88   | 1.16 (0.85-1.58) |       |
|                                | Ischemic stroke    | 21 772 | 135 | 6.29/6.20   | 1.13 (0.96-1.34) |       |

\* Individuals without/with major depressive episodes at baseline.

† Adjusted for age, sex, marital status, household income, education, region, smoking status, alcohol consumption, physical activity, BMI, history of hypertension and history of diabetes except for the stratification factor.

‡ Including hemorrhagic stroke, ischemic stroke and stroke of unknown type.

PYs indicates person-years; BMI, body mass index; MET, metabolic equivalent of task; HR, hazard ratio; and CI, confidence interval.
